# Supplementary material for: Estimated Change in Prevalence of Hypertension in Bangladesh According to Following JNC 7 and ACC/AHA 2017: Secondary Analysis From Nationally Representative Data
Source: Research Square preprint supplement (doi:10.21203/rs.3.rs-146416/v1), 2021-01-19
Supplement: Supplementary file 1 [file 0d50a95d7c5b4c560ef87e80.docx]

**Supplementary Table**

| **Supplementary Table 1.** Single Adjusted Model | | | | | |
| --- | --- | --- | --- | --- | --- |
|  | | **JNC 7** | | **2017 ACC/AHA** | |
| **Geographic Locations** | | UOR (95% CI) | P-Value | UOR (95% CI) | P-Value |
|  | Sylhet | 1 |  | 1 |  |
|  | Barisal | 1.44(1.13-1.83) | 0.003 | 1.28(1.03-1.57) | 0.022 |
|  | Chittagong | 1.22(1.00-1.48) | 0.053 | 1.22(1.03-1.44) | 0.020 |
|  | Dhaka | 0.95(0.78-1.16) | 0.613 | 0.94(0.80-1.10) | 0.453 |
|  | Khulna | 1.36(1.11-1.67) | 0.003 | 1.44(1.21-1.72) | <0.001 |
|  | Mymensingh | 0.86(0.68-1.09) | 0.217 | 0.93(0.77-1.12) | 0.423 |
|  | Rajshahi | 1.27(1.04-1.55) | 0.022 | 1.26(1.06-1.49) | 0.009 |
|  | Rangpur | 1.46(1.19-1.80) | <0.001 | 1.39(1.17-1.66) | <0.001 |
| **Place of Residence** | |  |  |  |  |
|  | Rural | 1 |  | 1 |  |
|  | Urban | 1.01(0.92-1.11) | 0.797 | 1.12(1.03-1.22) | 0.006 |
| **Sex of the Participants** | |  |  |  |  |
|  | Male | 1 |  | 1 |  |
|  | Female | 1.01(0.93-1.10) | 0.745 | 0.90(0.84-0.96) | 0.004 |
| **Age of the Participants, y** | |  |  |  |  |
|  | 18-24 | 1 |  | 1 |  |
|  | 25-34 | 1.96(1.63-2.36) | <0.001 | 1.72(1.53-1.92) | <0.001 |
|  | 35-44 | 4.13(3.46-4.93) | <0.001 | 2.74(2.43-3.08) | <0.001 |
|  | 45-54 | 6.21(5.18-7.45) | <0.001 | 3.77(3.31-4.30) | <0.001 |
|  | 55-64 | 7.95(6.60-9.58) | <0.001 | 3.96(3.44-4.56) | <0.001 |
|  | ≥65 | 12.15(10.04-14.69) | <0.001 | 5.13(4.40-5.98) | <0.001 |
| **BMI Level** | |  |  |  |  |
|  | Normal (18.5-24.9 kg/m2) | 1 |  | 1 |  |
|  | Underweight (<18.5 kg/m2) | 0.73(0.64-0.83) | <0.001 | 0.59(0.53-0.65) | <0.001 |
|  | Overweight (25.0-29.9 kg/m2) | 2.13(1.92-2.36) | <0.001 | 2.32(2.10-2.55) | <0.001 |
|  | Obesity (≥30.0 kg/m2) | 2.13(1.75-2.58) | <0.001 | 3.04(2.47-3.73) | <0.001 |
| **Education Level** | |  |  |  |  |
|  | Secondary Education | 1 |  | 1 |  |
|  | No Education | 1.90(1.70-2.12) | <0.001 | 1.53(1.39-1.69) | <0.001 |
|  | Primary | 1.19(1.06-1.33) | 0.003 | 1.07(0.97-1.17) | 0.176 |
|  | Higher | 0.99(0.86-1.14) | 0.877 | 1.04(0.93-1.16) | 0.532 |
| **Occupational Status** | |  |  |  |  |
|  | Not Working | 1 |  | 1 |  |
|  | Working | 0.82(0.75-0.89) | <0.001 | 0.99(0.92-1.07) | 0.842 |
| **Wealth Status** | |  |  |  |  |
|  | Middle | 1 |  | 1 |  |
|  | Poor | 0.91(0.81-1.03) | 0.127 | 0.82(0.75-0.91) | <0.001 |
|  | Rich | 1.15(1.02-1.28) | 0.018 | 1.12(1.02-1.24) | 0.019 |
| **Smoking** | |  |  |  |  |
|  | No | 1 |  | 1 |  |
|  | Yes | 1.23(1.10-1.38) | <0.001 | 1.15(1.08-1.28) | 0.008 |
